# Supplementary material
Source: PubMed Central journal article supplement (PMC4249265)
Supplement: IAI.02537-14_zii999090992so1.pdf [file IAI.02537-14_zii999090992so1.pdf]

Supplemental Figure 1: Strain-specific allelic variation in loci targeted for sequencing. The nucleotide sequences, with position representing the start of the open reading frame, are aligned for *omp 5, 9, 12, 13, and 14*. The black underline indicates the position of the primers. Strain designations are: SM, St. Maries; FL, Florida; SI, South Idaho; OK, Oklahoma; and WO, Washington-Okanogan.

omp5

1 135

SM (1) ATGCTGGTGGTGGAGAGTTTGCCTATGCCGCGCGTTATTTTGGCTGGGGAGAGGGAAAAGTTGCTTTGTTTGCAGGCGCATGCTCAGTTGCAGTGTGTTTGGTTTGCCTGTGTGCGCTCTGGCGCGGTACATATCGGG  
FL (1) ATGCTGGTGGTGGAGAGTTTGCCTATGCCGCGCGTTATTTTGGCTGGGGAGAGGGAAAAGTTGCTTTGTTTGCAGGCGCATGCTCAGTTGCAGTGTGTTTGGTTTGCCTGTGTGCGCTCTGGCGCGGTACATATCGGG  
SI (1) ATGCTGGTGGTGGAGAGTTTGCCTATGCCGCGCGTTATTTTGGCTGGGGAGAGGGAAAAGTTGCTTTGTTTGCAGGCGCATGCTCAGTTGCAGTGTGTTTGGTTTGCCTGTGTGCGCTCTGGCGCGGTACATATCGGG  
OK (1) ATGCTGGTGGTGGAGAGTTTGCCTATGCCGCGCGTTATTTTGGCTGGAGAGAGGGAAAAGTTGCTTTGTTTGCAGGCGCATGCTCAGTTGCAGTGTGTTTGGTTTGCCTGTGTGCGCTCTGGCGCGGTACATATCGGG  
WO (1) ATGCTGGTGGTGGAGAGTTTGCCTATGCCGCGCGTTATTTTGGCTGGGGAGAGGGAAAAGTTGCTTTGTTTGCAGGCGCATGCTCAGTTGCAGTGTGTTTGGTTTGCCTGTGTGCGCTCTGGCGCGGTACATATCGGG

136 270

SM (136) CATAAAGGTGCAGGTACGCGTCGTGTATATGTAGCCGGCACAGCAGGTTGGGCACGCAGTGCCTGCGGGATTTGAGATTAGGAACTATCGACGGCAAAACTGCAGGGGTGTTGCCCTTGTAGCCCACTCACGGC  
FL (136) CATAAAGGTGCAGGTACGCGTCGTGTATATGTAGCCGGCACAGCAGGTTGGGCACGCAGTGCCTGCGGGATTTGAGATTAGGAACTATCGACGGCAAAACTGCAGGGGTGTTGCCCTTGTAGCCCACTCACGGC  
SI (136) CATAAAGGTGCAGGTACGCGTCGTGTATATGTAGCCGGCACAGCAGGTTGGGCACGCAGTGCCTGCGGGATTTGAGATTAGGAACTATCGACGGCAAAACTGCAGGGGTGTTGCCCTTGTAGCCCACTCACGGC  
OK (136) CATAAAGGTGCAGGTACGCGTCGTGTATATGTAGCCGGCACAGCAGGTTGGGCACGCAGTGCCTGCGGGATTTGAGATTAGGAACTATCGACGGCAAAACTGCAGGGGTGTTGCCCTTGTAGCCCACTCACGGC  
WO (136) CATAAAGGTGCAGGTACGCGTCGTGTATATGTAGCCGGCACAGCAGGTTGGGCACGCAGTGCCTGCGGGATTTGAGATTAGGAACTATCGACGGCAAAACTGCAGGGGTGTTGCCCTTGTAGCCCACTCACGGC

271 405

SM (271) GCTGAGCACGCTGAACTGGTGGGAGAAATAACAAGTTTCGACTGGAAGTCGCCAAATCCGGACATAAGTTTTGGATGTGGAGATTTCCCGCGCTCGGGTGGTCAGCGGGATATACCACAGGTAGCGGTGAGATTT  
FL (271) GCTGAGCACGCTGAACTGGTGGAGAGATATAACAAGTTTCGACTGGAAGTCGCCAAATCCAGACATAAGTTTTGGATGTGGAGATTTCCCGCGCTCGGGTGGTCAGCGGGATATACCACAGGTAGAGTGTGAGATTT  
SI (271) GCTGAGCACGCTGAACTGGTGGGAGAAATAACAAGTTTCGACTGGAAGTCGCCAAATCCGGACATAAGTTTTGGATGTGGAGATTTCCCGCGCTCGGGTGGTCAGCGGGATATACCACAGGTAGAGTGTGAGATTT  
OK (271) GCTGAGCACGCTGAACTGGTGGAGAGATATAACAAGTTTCGACTGGAAGTCGCCAAATCCAGACATAAGTTTTGGATGTGGAGATTTCCCGCGCTCGGGTGGTCAGCGGGATATACCACAGGTAGAGTGTGAGATTT  
WO (271) GCTGAGCACGCTGAACTGGTGGGAGAAATAACAAGTTTCGACTGGAAGTCGCCAAATCCGGACATAAGTTTTGGATGTGGAGATTTCCCGCGCTCGGGTGGTCAGCGGGATATACCACAGGTAGCGGTGAGATTT

406 540

SM (406) GAGTTCGGAATGGAAGGGAGGAGATFCCCTGTAAAAATCGATGGAGAGTCTGCAGGTGGGGCTGGTTTTTCTTGTACTCAAGAACCTCACCTACGCTCTTGCCTATAATGGCAGCGCTAGCAGCCTTGCGGAA  
FL (406) GAGTTCGGAATGGAAGGGAGGAGATFCCCTGTAAAAATCGATGGAGAGTCTGCAGGTGGGGCTGGTTTTTCTTGTACTCAAGAACCTCACCTACGCTCTTGCCTATAATGGCAGCCTAGCAGCCTTGCGGAA  
SI (406) GAGTTCGGAATGGAAGGGAGGAGATFCCCTGTAAAAATCGATGGAGAGTCTGCAGGTGGGGCTGGTTTTTCTTGTACTCAAGAACCTCACCTACGCTCTTGCCTATAATGGCAGCCTAGCAGCCTTGCGGAA  
OK (406) GAGTTCGGAATGGAAGGGAGGAGATFCCCTGTAAAAATCGATGGAGAGTCTGCAGGTGGGGCTGGTTTTTCTTGTACTCAAGAACCTCACCTACGCTCTTGCCTATAATGGCAGCCTAGCAGCCTTGCGGAA  
WO (406) GAGTTCGGAATGGAAGGGAGGAGATFCCCTGTAAAAATCGATGGAGAGTCTGCAGGTGGGGCTGGTTTTTCTTGTACTCAAGAACCTCACCTACGCTCTTGCCTATAATGGCAGCGCTAGCAGCCTTGCGGAA

541 675

SM (541) GCCCTGGAAGCTGCACAGGATGCCAGGGCGGTTATCTATAGATTC-----GAGCACAACT-----ACTGCAATGTACAAAATGTCCATGTATGGGTACGATGACGCAGAGTAT-----GCAGCGGAA  
FL (541) GCCCTGGAAGCTGCACAGGATGCCAGGGCGGCTAGGTTATATACCATCAGATGACAGTTTGGACACCGCAATATACAAAGTTTCCGTTGAGCGACACGATGATACCAGGATATAGTGTGAGCGTGCAGCGGAA  
SI (541) GCCCTGGAAGCTGCACAGGATGCCAGGGCGGTTATCTATAGATTC-----GAGCACAACT-----ACTGCAATGTACAAAATGTCCATGTATGGGTACGATGACGCAGAGTAT-----GCAGCGGAA  
OK (541) GCCCTGGAAGCTGCACAGGATGCCAGGGCGGCTAGGTTATATACCATCAGATGACAGTTTGGACACCGCAATATACAAAGTTTCCGTTGAGCGACACGATGATACCAGGATATAGTGTGAGCGTGCAGCGGAA  
WO (541) GCCCTGGAAGCTGCACAGGATGCCAGGGCGGTTATCTATAGATTC-----GAGCACAACT-----ACTGCAATGTACAAAATGTCCATGTATGGGTACGATGACGCAGAGTAT-----GCAGCGGAA

676 810

SM (655) CAGCTCGCACTGTTACGACGGAAGATAGACTGGCTGCGGCTAAGCTGCTCAGCAAGTAGAGAACGGTGGCGGAGAGACCGCTGCAGTGGTAGAGGTAACGAAATAGAAACCACAGCGGCCATGTTTTCAGTGC  
FL (676) CCGCTTGCCTGTTACGACGGAAGATAGACTGGCTGCGGCTAAGCTGCTCAGTAAAGCCGACAGATGGCATCGGCGAAGTCTCTGCAGTGGTAGAGGTAACGAAATAGAAACCACAGCGGCCATGTTTTCAGTGC  
SI (655) CAGCTCGCACTGTTACGACGGAAGATAGACTGGCTGCGGCTAAGCTGCTCAGTAAAGTAGAGAACGGTGGCGGAGAGACCGCTGCAGTGGTAGAGGTAACGAAATAGAAACCACAGCGGCCATGTTTTCAGTGC  
OK (676) CCGCTTGCCTGTTACGACGGAAGATAGACTGGCTGCGGCTAAGCTGCTCAGTAAAGTAGAGAACGGTGGCGGAGAGACCGCTGCAGTGGTAGAGGTAACGAAATAGAAACCACAGCGGCCATGTTTTCAGTGC  
WO (655) CAGCTCGCACTGTTACGACGGAAGATAGACTGGCTGCGGCTAAGCTGCTCAGCAAGTAGAGAACGGTGGCGGAGAGACCGCTGCAGTGGTAGAGGTAACGAAATAGAAACCACAGCGGCCATGTTTTCAGTGC

811 945

SM (790) TGTTACGATGCCCCAGCAGCGCATTTCTCAGGGCTCTTACCCTGATGTTTGGGAAGCGTCGGTGGAAATTTAGTCGATGTATCCGGTAACATCCTCTGGAACCTTGCATATAGAGCGCGCTAGGAGTGAAC  
FL (811) TGTTACGATGCCCCAGCAGCGCATTTCTCAGGGCTCTTACCCTGATGTTTGGGAAGCGTCGGTGGAAATTTAGTCGATGTATCCGGTAACATCCTCTGGAACCTTGCATATAGAGCGCGCTAGGAGTGAAC  
SI (790) TGTTACGATGCCCCAGCAGCGCATTTCTCAGGGCTCTTACCCTGATGTTTGGGAAGCGTCGGTGGAAATTTAGTCGATGTATCCGGTAACATCCTCTGGAACCTTGCATATAGAGCGCGCTAGGAGTGAAC  
OK (811) TGTTACGATGCCCCAGCAGCGCATTTCTCAGGGCTCTTACCCTGATGTTTGGGAAGCGTCGGTGGAAATTTAGTCGATGTATCCGGTAACATCCTCTGGAACCTTGCATATAGAGCGCGCTAGGAGTGAAC  
WO (790) TGTTACGATGCCCCAGCAGCGCATTTCTCAGGGCTCTTACCCTGATGTTTGGGAAGCGTCGGTGGAAATTTAGTCGATGTATCCGGTAACATCCTCTGGAACCTTGCATATAGAGCGCGCTAGGAGTGAAC

946 1080

SM (925) TACATGCTTACGCAAAGGTCTCGGTGAATTTGGAAGCCTTTGTCCACAAGGTACCCGGTGGGTCGTTATAGAAAATTTGTCGTTGAGCATGTGCTGGGAGATACATATGCCGACCAGGGCAGCAATTTTGTCT  
FL (946) TACATGCTTACGCAAAGGTCTCGGTGAATTTGGAAGCCTTTGTCCACAAGGTACCCGGTGGGTCGTTATAGAAAATTTGTCGTTGAGCATGTGCTGGGAGATACATATGCCGACCAGGGCAGCAATTTTGTCT  
SI (925) TACATGCTTACGCAAAGGTCTCGGTGAATTTGGAAGCCTTTGTCCACAAGGTACCCGGTGGGTCGTTATAGAAAATTTGTCGTTGAGCATGTGCTGGGAGATACATATGCCGACCAGGGCAGCAATTTTGTCT  
OK (946) TACATGCTTACGCAAAGGTCTCGGTGAATTTGGAAGCCTTTGTCCACAAGGTACCCGGTGGGTCGTTATAGAAAATTTGTCGTTGAGCATGTGCTGGGAGATACATATGCCGACCAGGGCAGCAATTTTGTCT  
WO (925) TACATGCTTACGCAAAGGTCTCGGTGAATTTGGAAGCCTTTGTCCACAAGGTACCCGGTGGGTCGTTATAGAAAATTTGTCGTTGAGCATGTGCTGGGAGATACATATGCCGACCAGGGCAGCAATTTTGTCT

1081 1140

SM (1060) GACGTTTCACTCAAGCTTTCTACTCTGGTTGCAATCTGGGGCTGAAGCTCGAGTTTTAG  
FL (1081) GACGTTGCACTCAAGCTTTCTACTCTGGTTGCAATCTGGGGCTGAAGCTCGAGTTTTAG  
SI (1060) GACGTTGCACTCAAGCTTTCTACTCTGGTTGCAATCTGGGGCTGAAGCTCGAGTTTTAG  
OK (1081) GACGTTGCACTCAAGCTTTCTACTCTGGTTGCAATCTGGGGCTGAAGCTCGAGTTTTAG  
WO (1060) GACGTTTCACTCAAGCTTTCTACTCTGGTTGCAATCTGGGGCTGAAGCTCGAGTTTTAG

omp9

1 135

SM (1) GTGGTTAGGCTCTTTCTGTTGAGCGCGGTTGTAGCTGGGGCTCTTGCGTTTGGTTCGCTCTGCTGTGCGGCAGGGTTGGTGGTATGATACTGACTTTTACTTAGGATTTGGGCTTGCCTCCGCATTTGGGGAT

FL (1) GTGGTTAGGCTCTTTCTGTTGAGCGCGGTTGTAGCTGGGGCTCTTGCGTTTGGTTCGCTCTGCTGTGCGGCAGGGTTGGTGGTATGATACTGACTTTTACTTAGGATTTGGGCTTGCCTCCGCATTTGGGGAT

SI (1) GTGGTTAGGCTCTTTCTGTTGAGCGCGGTTGTAGCTGGGGCTCTTGCGTTTGGTTCGCTCTGCTGTGCGGCAGAGATTGGTGGTGAAGATACCGACTTTTACTTTGGATTGGGCTTGCCTCCGCATTTGGGGAT

OK (1) GTGGTTAGGCTCTTTCTGTTGAGCGCGGTTGTAGCTGGGGCTCTTGCGTTTGGTTCGCTCTGCTGTGCGGCAGGGTTGGTGGTATGATACTGACTTTTACTTAGGATTTGGGCTTGCCTCCGCATTTGGGGAT

WO (1) GTGGTTAGGCTCTTTCTGTTGAGCGCGGTTGTAGCTGGGGCTCTTGCGTTTGGTTCGCTCTGCTGTGCGGCAGAGATTGGTGGTGAAGATACCGACTTTTACTTTGGATTGGGCTTGCCTCCGCATTTGGGGAT

136 270

SM (136) GTGGCGGATTCTACGCTGAAGTTCCTGGTGGCGGGATTCCGCATTGCCTTACCGGAAAGATGCCGTTGGCAGCTGGGAACTTCGCCCTTTGACTTTGATTGGGAAGGGTCAGGTACCAAGGGGAGTAAATAC

FL (136) GTGGCGGATTCTACGCTGAAGTTCCTGGTGGCGGGATTCCGCATTGCCTTACCGGAAAGATGCCGTTGGTAGCTGGGAACTTCGCCCTTTGACTTTGATTGGGAAGGGTCAGGTACCAAGGGGAGTAAATAC

SI (136) GTGGCGGATTCTACGCTGAAGTTCCTGGTGGCGGGATTCCGCATTGCCTTACCGGAAAGATGCCGTTGGCAGCTGGGAACTTCGCCCTTTGACTTTGATTGGGAAGGGTCAGGTACCAAGGGGAGTAAATAC

OK (136) GTGGCGGATTCTACGCTGAAGTTCCTGGTGGCGGGATTCCGCATTGCCTTACCGGAAAGATGCCGTTGGTAGCTGGGAACTTCGCCCTTTGACTTTGATTGGGAAGGGTCAGGTACCAAGGGGAGTAAATAC

WO (136) GTGGCGGATTCTACGCTGAAGTTCCTGGTGGCGGGATTCCGCATTGCCTTACCGGAAAGATGCCGTTGGCAGCTGGGAACTTCGCCCTTTGACTTTGATTGGGAAGGGTCAGGTACCAAGGGGAGTAAATAC

271 405

SM (271) CCGATAAAAATCCAGCGCAGGAGCTTGTGTTGGAATGGTGGGAAGTGTAGGGGTGCGCCACTCAAATAGTAGATTGGAGTTTGAAGCAGCATGTGAGCGCTTTCCCGTCATGAAGGTGAGTGGCAGAACGTGGGGC

FL (271) CCGATAAAAATCCAGCGCAGGAGCTTGTGTTGGAATGGTGGGAAGTGTAGGGGTGCGCCACTCAAATAGTAGATTGGAGTTTGAAGCAGCATGTGAGCGCTTTCCCGTCATGAAGGTGAGTGGCAGAACGTGGGGC

SI (271) CCGATAAAAATCCAGCGCAGGAGCTTGTGTTGGAATGGTGGGAAGTGTAGGGGTGCGCCACTCAAATAGTAGATTGGAGTTTGAAGCAGCATGTGAGCGCTTTCCCGTCATGAAGGTGAGTGGCAGAACGTGGGGC

OK (271) CCGATAAAAATCCAGCGCAGGAGCTTGTGTTGGAATGGTGGGAAGTGTAGGGGTGCGCCACTCAAATAGTAGATTGGAGTTTGAAGCAGCATGTGAGCGCTTTCCCGTCATGAAGGTGAGTGGCAGAACGTGGGGC

WO (271) CCGATAAAAATCCAGCGCAGGAGCTTGTGTTGGAATGGTGGGAAGTGTAGGGGTGCGCCACTCAAATAGTAGATTGGAGTTTGAAGCAGCATGTGAGCGCTTTCCCGTCATGAAGGTGAGTGGCAGAACGTGGGGC

406 540

SM (406) AAGGGAGACTCAATATTCCTTCTTTGATAGATGATGCAGTGGTACGGTTTGTACAGGGCAGAGAAGTGCCGGTGATACCGATAATCAAGCTGTGAAGTCACTACACGACCTGACTGTGCAACATGCGGATCTTGAT

FL (406) AAGGGAGACTCAATATTCCTTCTTTGATAGATGATGCAGTGGTACGGTTTGTACAGGGCAGAGAAGTGCCGGTGATACCGATAATCAAGCTGTGAAGTCACTACACGACCTGACTGTGCAACATGCGGATCTTGAT

SI (406) AAGGGAGACTCAATATTCCTTCTTTGATAGATGATGCAGTGGTACGGTTTGTACAGGGCAGAGAAGTGCCGGTGATACCGATAATCAAGCTGTGAAGTCACTACACGACCTGACTGTGCAACATGCGGATCTTGAT

OK (406) AAGGGAGACTCAATATTCCTTCTTTGATAGATGATGCAGTGGTACGGTTTGTACAGGGCAGAGAAGTGCCGGTGATACCGATAATCAAGCTGTGAAGTCACTACACGACCTGACTGTGCAACATGCGGATCTTGAT

WO (406) AAGGGAGACTCAATATTCCTTCTTTGATAGATGATGCAGTGGTACGGTTTGTACAGGGCAGAGAAGTGCCGGTGATACCGATAATCAAGCTGTGAAGTCACTACACGACCTGACTGTGCAACATGCGGATCTTGAT

541 675

SM (541) GCTTTATTCAGTGCCTGAACACTGCGATCCAGCAGAGGAAGACAGCGCATCGTGAAGGGAGGTGCTCTGACACACAGGAACAGCCCGGAAGATGCTTTAGCGCGACTCAAATGTTGCTCGGGCGTGGGGG

FL (541) GCTTTATTCAGTGCCTGAACACTGCGATCCAGCAGAGGAAGACAGCGCATCGTGAAGGGAGGTGCTCTGACACACAGGAACAGCCCGGAAGATGCTTTAGCGCGACTCAAATGTTGCTCGGGCGTGGGGG

SI (541) GAGTTCTTCAGTGCCTTCCCACTGCGAAGCAGAAATAA-----AG-----GTGTTCTGGGCGCTGGGCACACAGGAGCAAAATACGACGATGTTTGAACGCGACTAAGATTGTTGCTCGGGCGTGGGGG

OK (541) GCTTTATTCAGTGCCTGAACACTGCGATCCAGCAGAGGAAGACAGCGCATCGTGAAGGGAGGTGCTCTGACACACAGGAACAGCCCGGAAGATGCTTTAGCGCGACTCAAATGTTGCTCGGGCGTGGGGG

WO (541) GAGTTCTTCAGTGCCTTCCCACTGCGAAGCAGAAATAA-----AG-----GTGTTCTGGGCGCTGGGCACACAGGAGCAAAATACGACGATGTTTGAACGCGACTAAGATTGTTGCTCGGGCGTGGGGG

676 810

SM (676) CGCAAGTATGGATCAGGGGGTCTTGGTCCCGCGGAAACCAGGAGAAGGGTTCGCGTGTCTGTGCTGTGCTGCAGCCAGGGTTGGTGGCGGAAGAGCGTGAAATGTTGAAAAGGGCGCACATGATTGGAATTGCCCTT

FL (676) CGCAAGTATGGATCAGGGGGTCTTGGTCCCGCGGAAACCAGGAGAAGGGTTCGCGTGTCTGTGCTGTGCTGCAGCCAGGGTTGGTGGCGGAAGAGCGTGAAATGTTGAAAAGGGCGCACATGATTGGAATTGCCCTT

SI (664) CGCAAGTATGGATCAGGGGGTCTTGGTACC CGGGAAGCCAGGAGAAGGGCCGCTGCTGCTGCTGCTGCAGCCAGAGTTGGTGGCGGAAGAGCGTGAAATGTTGAAAAGGGCGCACATGATTGGAATTGCCCTT

OK (676) CGCAAGTATGGATCAGGGGGTCTTGGTACC CGGGAAGCCAGGAGAAGGGCCGCTGCTGCTGCTGCTGCAGCCAGGGTTGGTGGCGGAAGAGCGTGAAATGTTGAAAAGGGCGCACATGATTGGAATTGCCCTT

WO (664) CGCAAGTATGGATCAGGGGGTCTTGGTACC CGGGAAGCCAGGAGAAGGGCCGCTGCTGCTGCTGCTGCAGCCAGAGTTGGTGGCGGAAGAGCGTGAAATGTTGAAAAGGGCGCACATGATTGGAATTGCCCTT

811 945

SM (811) GGCGCATTTGGTGGATACAGGATCAAATACTGCGGTGCTGGCCAAACACTTTTGGCGCAAACACTACTGTTATGATATTTCTACTGTTAACGTGAGGGGTTTGTCCCACATACGGCTGTGTTAGCATCGGGATGAGC

FL (811) GGCGCATTTGGTGGATACAGGATCAAATACTGCGGTGCTGGCCAAACACTTTTGGCGCAAACACTACTGTTATGATATTTCTACTGTTAACGTGAGGGGTTTGTCCCACATACGGCTGTGTTAGCATCGGGATGAGC

SI (799) GGCGCATTTGGTGGATACAGGATCAAATACTGCGGTGCTGGCCAAACACTTTTGGCGCAAACACTACTGTTATGATATTTCTACTGTTAACGTGAGGGGTTTGTCCCACATACGGCTGTGTTAGCATCGGGATGAGC

OK (811) GGCGCATTTGGTGGATACAGGATCAAATACTGCGGTGCTGGCCAAACACTTTTGGCGCAAACACTACTGTTATGATATTTCTACTGTTAACGTGAGGGGTTTGTCCCACATACGGCTGTGTTAGCATCGGGATGAGC

WO (799) GGCGCATTTGGTGGATACAGGATCAAATACTGCGGTGCTGGCCAAACACTTTTGGCGCAAACACTACTGTTATGATATTTCTACTGTTAACGTGAGGGGTTTGTCCCACATACGGCTGTGTTAGCATCGGGATGAGC

946 1080

SM (946) TTTTGAAGGTGGCCGAGAACAGTGTCCGAAGTTTACATATGGTGCAAAACTGGGCGTGAGTTACGAGCTCTCTCCACGGGCTAGGGTTTTTGTGCGATGGAGCGTACCGGAGGGCTGTGGAGTACAGCGAACCG

FL (946) TTTTGAAGGTGGCCGAGAACAGTGTCCGAAGTTTACATATGGTGCAAAACTGGGCGTGAGTTACGAGCTCTCTCCACGGGCTAGGGTTTTTGTGCGATGGAGCGTACCGGAGGGCTGTGGAGTACAGCGAACCG

SI (934) TTTTGAAGGTGGCCGAGAACAGTGTCCGAAGTTTACATATGGTGCAAAACTGGGCGTGAGTTACGAGCTCTCTCCACGGGCTAGGGTTTTTGTGCGATGGAGCGTACCGGAGGGCTGTGGAGTACAGCGAACCG

OK (946) TTTTGAAGGTGGCCGAGAACAGTGTCCGAAGTTTACATATGGTGCAAAACTGGGCGTGAGTTACGAGCTCTCTCCACGGGCTAGGGTTTTTGTGCGATGGAGCGTACCGGAGGGCTGTGGAGTACAGCGAACCG

WO (934) TTTTGAAGGTGGCCGAGAACAGTGTCCGAAGTTTACATATGGTGCAAAACTGGGCGTGAGTTACGAGCTCTCTCCACGGGCTAGGGTTTTTGTGCGATGGAGCGTACCGGAGGGCTGTGGAGTACAGCGAACCG

1081 1212

SM (1081) TGCCCGGTGTCTACGCTGTCTGCAGCGTCAGATTATAGTGAATATGTTGAGAGGGGAAGATGTCAAGGCACCGCGTGCCTTTGGGTTGCATTACCTGGCACTGGAGGCGGGGTTGAGATTTATACTCGCGTAG

FL (1081) TGCCCGGTGTCTACGCTGTCTGCAGCGTCAGATTATAGTGAATATGTTGAGAGGGGAAGATGTCAAGGCACCGCGTGCCTTTGGGTTGCATTACCTGGCACTGGAGGCGGGTTGAGATTTATACTCGCGTAG

SI (1069) TGCCCGGTGTCTACGCTGTCTGCAGCGTCAGATTATAGTGAATATGTTGAGAGGGGAAGATGTCAAGGCACCGCGTGCCTTTGGGTTGCATTACCTGGCACTGGAGGCGGGGTTGAGATTTATACTCGCGTAG

OK (1081) TGCCCGGTGTCTACGCTGTCTGCAGCGTCAGATTATAGTGAATATGTTGAGAGGGGAAGATGTCAAGGCACCGCGTGCCTTTGGGTTGCATTACCTGGCACTGGAGGCGGGGTTGAGATTTATACTCGCGTAG

WO (1069) TGCCCGGTGTCTACGCTGTCTGCAGCGTCAGATTATAGTGAATATGTTGAGAGGGGAAGATGTCAAGGCACCGCGTGCCTTTGGGTTGCATTACCTGGCACTGGAGGCGGGGTTGAGATTTATACTCGCGTAG

omp12

1 135

SM (1) ATGGGATCTATGATGAGGGCAACAAAAAAGGCAGCATTTCCGTTTCGAGTGTGGATATTCATCGCGGTTTTGCTTTTTCTCCACAGGCCTTTCCGCAAGCAATTGCCCGTTACGCAAATTCAGATCACAGGGG  
FL (1) ATGGGATCTATGATGAGGGCAACAAAAAAGGCAGCATTTCCGTTTCGAGTGTGGATATTCATCGCGGTTTTGCTTTTTCTCCACAGGCCTTTCCGCAAGCAATTGCCCGTTACGCAAATTCAGATCACAGGGG  
SI (1) ATGGGATCTATGATGAGGGCAACAAAAAAGGCAGCATTTCCGTTTCGAGTGTGGATATTCATCGCGGTTTTGCTTTTTCTCCACAGGCCTTTCCGCAAGCAATTGCCCGTTACGCAAATTCAGATCACAGGGG  
OK (1) ATGGGATCTATGATGAGGGCAACAAAAAAGGCAGCATTTCCGTTTCGAGTGTGGATATTCATCGCGGTTTTGCTTTTTCTCCACAGGCCTTTCCGCAAGCAATTGCCCGTTACGCAAATTCAGATCACAGGGG  
WO (1) ATGGGATCTATGATGAGGGCAACAAAAAAGGCAGCATTTCCGTTTCGAGTGTGGATATTCATCGCGGTTTTGCTTTTTCTCCACAGGCCTTTCCGCAAGCAATTGCCCGTTACGCAAATTCAGATCACAGGGG

136 270

SM (136) CGAGCGTACCTTATTGGCGCTTACAAAAGCAGCTTTCCCGATTTTGGCAATTTGAAGATAAGCGAAGGGCAGCTTCTACGCCAGGAGTGGCAACAGTTGCGCAAATGAGCATGAATGGGAGCGTTATTGTTGAT  
FL (136) CGAGCGTACCTTATTGGCGCTTACAAAAGCAGCTTTCCCGATTTTGGTAATTTGAAGATAAGCGAAGGGCAGCTTCTACGCCAGGAGTGGCAACAGTTGCGCAAATGAGCATGAATGGGAGCGTTATTGTTGAT  
SI (136) CGAGCGTACCTTATTGGCGCTTACAAAAGCAGCTTTCCCGATTTTGGCAATTTGAAGATAAGCGAAAGGCAGCTTCTACGCCAGGAGTGGCAACAGTTGCGCAAATGAGCATGAATGGGAGCGTTATTGTTGAT  
OK (136) CGAGCGTACCTTATTGGCGCTTACAAAAGCAGCTTTCCCGATTTTGGTAATTTGAAGATAAGCGAAGGGCAGCTTCTACGCCAGGAGTGGCAACAGTTGCGCAAATGAGCATGAATGGGAGCGTTATTGTTGAT  
WO (136) CGAGCGTACCTTATTGGCGCTTACAAAAGCAGCTTTCCCGATTTTGGTAATTTGAAGATAAGCGAAGGGCAGCTTCTACGCCAGGAGTGGCAACAGTTGCGCAAATGAGCATGAATGGGAGCGTTATTGTTGAT

271 405

SM (271) ATACACAACCACAAAGCTTTTGGGCCGTATAGGCCGCTTTTTACAATAGCGATTATCTGGAATTTGCTGGGGTGTGGGCTACAGCGCTGGCCCCGTGAGACTGGAATTAGAGCGGTTTTCACAGTGTGTTTGAG  
FL (271) ATACACAACCACAAAGCTTTTGGGCCGTATAGGCCGCTTTTTACAATAGCGATTATCTGGAATTTGCTGGGGTGTGGGCTACAGCGCTGGCCCCGTGAGACTGGAATTAGAGCGGTTTTCACAGTGTGTTTGAG  
SI (271) ATACACAACCACAAAGCTTTTGGGCCGTATAGGCCGCTTTTTACAATAGCGATTATCTGGAATTTGCTGGGGTGTGGGCTACAGCGCTGGCCCCGTGAGACTGGAATTAGAGCGGTTTTCACAGTGTGTTTGAG  
OK (271) ATACACAACCACAAAGCTTTTGGGCCGTATAGGCCGCTTTTTACAATAGCGATTATCTGGAATTTGCTGGGGTGTGGGCTACAGCGCTGGCCCCGTGAGACTGGAATTAGAGCGGTTTTCACAGTGTGTTTGAG  
WO (271) ATACACAACCACAAAGCTTTTGGGCCGTATAGGCCGCTTTTTACAATAGCGATTATCTGGAATTTGCTGGGGTGTGGGCTACAGCGCTGGCCCCGTGAGACTGGAATTAGAGCGGTTTTCACAGTGTGTTTGAG

406 540

SM (406) ACAAAGCGGGGTTGGTTCGGTCAATAAGGACGATGCATGCAACATAGCGCTAGTCAGGGCTCAGACAATAATGCCAGGGAACACGCAGTTGTGGAAAACAGGAAAATCGACGTATCCTCCGTAGCGCTGAAC  
FL (406) ACAAAGCGGGGTTGGTTCGGTCAATAAGGACGATGCATGCAACATAGCGCTAGTCAGGGCTCAGACAATAATGCCAGGGAACACGCAGTTGTGGAAAACAGGAAAATCGACGTATCCTCCGTAGCGCTGAAC  
SI (406) ACAAAGCGGGGTTGGTTCGGTCAATAAGGACGATGCATGCAACATAGCGCTAGTCAGGGCTCAGACAATAATGCCAGGGAACACGCAGTTGTGGAAAACAGGAAAATCGACGTATCCTCCGTAGCGCTGAAC  
OK (406) ACAAAGCGGGGTTGGTTCGGTCAATAAGGATGATGCATGCAACATAGCGCTAGTCAGGGCTCAGACAATAATGCCAGGGAACACGCAGTTGTGGAAAACAGGAAAATCGACGTATCCTCCGTAGCGCTGAAC  
WO (406) ACAAAGCGGGGTTGGTTCGGTCAATAAGGACGATGCATGCAACATAGCGCTAGTCAGGGCTCAGACAATAATGCCAGGGAACACGCAGTTGTGGAAAACAGGAAAATCGACGTATCCTCCGTAGCGCTGAAC

541 675

SM (541) TTATGCTACGAACAGATACAAATTAGTGCTGCACTTGGATACGTATGTGTGGCGTAAGCGGGAACAGGTTGAGTCTGCTAAACACTGGCGACGTTACTCATGGATATCAGGGCAAAATGGGTGTGGGAATTCGG  
FL (541) TTATGCTACGAACAGATACAAATTAGTGCTGCACTTGGATACGTATGTGTGGCGTAAGCGGGAACAGGTTGAGTCTGCTAAACACTGGCGACGTTACTCATGGATATCAGGGCAAAATGGGTGTGGGAATTCGG  
SI (541) TTATGCTACGAACAGATACAAATTAGTGCTGCACTTGGATACGTATGTGTGGCGTAAGCGGGAACAGGTTGAGTCTGCTAAACACTGGCGACGTTACTCATGGATATCAGGGCAAAATGGGTGTGGGAATTCGG  
OK (541) TTATGCTACGAACAGATACAAATTAGTGCTGCACTTGGATACGTATGTGTGGCGTAAGCGGGAACAGGTTGAGTCTGCTAAACACTGGCGACGTTACTCATGGATATCAGGGCAAAATGGGTGTGGGAATTCGG  
WO (541) TTATGCTACGAACAGATACAAATTAGTGCTGCACTTGGATACGTATGTGTGGCGTAAGCGGGAACAGGTTGAGTCTGCTAAACACTGGCGACGTTACTCATGGATATCAGGGCAAAATGGGTGTGGGAATTCGG

676 810

SM (676) ATGACGCGGGGTGTGACGCTATTTATTGGTACGTACTACCACATGCTTCACAGTAGCCGCTTTAGTTCCGTTGGCCTTTGATGCTCGTGCCCAAACCTGTGGCTGCTAAAGCCAATATG  
FL (676) ATGACGCGGGGTGTGACGCTATTTATTGGTACGTACTACCACATGCTTCACAGCAGCCGCTTTAGTTCCGTTGGCCTTTGATGCTCGTGCCCAAACCTGTGGCTGCTAAAGCCAATATG  
SI (676) ATGACGCGGGGTGTGACGCTATTTATTGGTACGTACTACCACATGCTTCACAGTAGCCGCTTTAGTTCCGTTGGCCTTTGATGCTCGTGCCCAAACCTGTGGCTGCTAAAGCCAATATG  
OK (676) ATGACGCGGGGTGTGACGCTATTTATTGGTACGTACTACCACATGCTTCACAGCAGCCGCTTTAGTTCCGTTGGCCTTTGATGCTCGTGCCCAAACCTGTGGCTGCTAAAGCCAATATG  
WO (676) ATGACGCGGGGTGTGACGCTATTTATTGGTACGTACTACCACATGCTTCACAGCAGCCGCTTTAGTTCCGTTGGCCTTTGATGCTCGTGCCCAAACCTGTGGCTGCTAAAGCCAATATG

811 858

SM (811) CGCATAGCTCACTTTGGAGGGGAATTTGGCGCTAGGTATATGTTTTAG  
FL (811) CGCATAGCTCACTTTGGAGGGGAATTTGGCGCTAGGTATATGTTTTAG  
SI (811) CGCATAGCTCACTTTGGAGGGGAATTTGGCGCTAGGTATATGTTTTAG  
OK (811) CGCATAGCTCACTTTGGAGGGGAATTTGGCGCTAGGTATATGTTTTAG  
WO (811) CGCATAGCTCACTTTGGAGGGGAATTTGGCGCTAGGTATATGTTTTAG

omp13

1

135

SM (1) ATGGTTAAAGCAGGGGAGCATGGTTGAGTCGTAACGTGATTGCCGATGCACCGCATGGTTGTGGTGTCTGGGCGCGTGCAGGAGGGTTGAAAGGGATGGCTTTGCGGTGGAGG  
FL (1) ATGGTTAAAGCAGGGGAGCATGGTTGAGTCGTAACGTGATTGCCGATGCACCGCATGGTTGTGGTGTCTGGGCGCGTGCAGGAGGGTTGAAAGGGATGGCTTTGCGGTGGAGG  
SI (1) ATGGTTAAAGCAGGGGAGCATGGTTGAGTCGTAACGTGATTGCCGATGCACCGCATGGTTGTGGTGTCTGGGCGCGTGCAGGAGGGTTGAAAGGGATGGCTTTGCGGTGGAGG  
OK (1) ATGGTTAAAGCAGGGGAGCATGGTTGAGTCGTAACGTGATTGCCGATGCACCGCATGGTTGTGGTGTCTGGGCGCGTGCAGGAGGGTTGAAAGGGATGGCTTTGCGGTGGAGG  
WO (1) ATGGTTAAAGCAGGGGAGCATGGTTGAGTCGTAACGTGATTGCCGATGCACCGCATGGTTGTGGTGTCTGGGCGCGTGCAGGAGGGTTGAAAGGGATGGCTTTGCGGTGGAGG

136

270

SM (136) CTCGCCGTTATAACCTTGGCGGTGTGTTTTTATGTTTGTTCATGCAGAGGTGTGCTCTGCTGCAGGGTTTTACGCTTCTATGGGGTATCGGCCGCGCTTCAGAAATATTGGTAGGCTTGCAATGTCAATGGAT  
FL (136) CTCGCCGTTATAACCTTGGCGGTGTGTTTTTATGTTTGTTCATGCAGAGGTGTGCTCTGCTGCAGGGTTTTACGCTTCTATGGGGTATCGGCCGCGCTTCAGAAATATTGGTAGGCTTGCAATGTCAATGGAT  
SI (136) CTCGCCGTTATAACCTTGGCGGTGTGTTTTTATGTTTGTTCATGCAGAGGTGTGCTCTGCTGCAGGGTTTTACGCTTCTATGGGGTATCGGCCGCGCTTCAGAAATATTGGTAGGCTTGCAATGTCAATGGAT  
OK (136) CTCGCCGTTATAACCTTGGCGGTGTGTTTTTATGTTTGTTCATGCAGAGGTGTGCTCTGCTGCAGGGTTTTACGCTTCTATGGGGTATCGGCCGCGCTTCAGAAATATTGGTAGGCTTGCAATGTCAATGGAT  
WO (136) CTCGCCGTTATAACCTTGGCGGTGTGTTTTTATGTTTGTTCATGCAGAGGTGTGCTCTGCTGCAGGGTTTTACGCTTCTATGGGGTATCGGCCGCGCTTCAGAAATATTGGTAGGCTTGCAATGTCAATGGAT

271

405

SM (271) GGGCGCACTGCTGATGTTTTTGGCGCGGGTCTGGATACATGTTGCCGCTCCTCTGGAGGCGCGTGAAGTTGATAGCCGCATGATAGAAAAGGATGCGGTCAGCAAGGGCCCGCTTCAGTGACGTA  
FL (271) GGGCGCACTGCTGATGTTTTTGGCGCGGGTCTGGATACATGTTGCCGCTCCTCTGGAGGCGCGTGAAGTTGATAGCCGCATGATAGAAAAGGATGCGGTCAGCAAGGGCCCGCTTCAGTGACGTA  
SI (271) GGGCGCACTGCTGATGTTTTTGGCGCGGGTCTGGATACATGTTGCCGCTCCTCTGGAGGCGCGTGAAGTTGATAGCCGCATGATAGAAAAGGATGCGGTCAGCAAGGGCCCGCTTCAGTGACGTA  
OK (271) GGGCGCACTGCTGATGTTTTTGGCGCGGGTCTGGATACATGTTGCCGCTCCTCTGGAGGCGCGTGAAGTTGATAGCCGCATGATAGAAAAGGATGCGGTCAGCAAGGGCCCGCTTCAGTGACGTA  
WO (271) GGGCGCACTGCTGATGTTTTTGGCGCGGGTCTGGATACATGTTGCCGCTCCTCTGGAGGCGCGTGAAGTTGATAGCCGCATGATAGAAAAGGATGCGGTCAGCAAGGGCCCGCTTCAGTGACGTA

406

540

SM (406) ACGGGTGTGTTTGGCGTCTTGGGTGCTGCTGACCGCGGCTTTAGGTTGGAATTTAAGGTTGCGAGGAGCTTTTTGGTGTCTATACGCACCAGGGGTGACGCCCTCATTGACCATAAGGATGTA  
FL (406) ACGGGTGTGTTTGGCGTCTTGGGTGCTGCTGACCGCGGCTTTAGGTTGGAATTTAAGGTTGCGAGGAGCTTTTTGGTGTCTATACGCACCAGGGGTGACGCCCTCATTGACCATAAGGATGTA  
SI (406) ACGGGTGTGTTTGGCGTCTTGGGTGCTGCTGACCGCGGCTTTAGGTTGGAATTTAAGGTTGCGAGGAGCTTTTTGGTGTCTATACGCACCAGGGGTGACGCCCTCATTGACCATAAGGATGTA  
OK (406) ACGGGTGTGTTTGGCGTCTTGGGTGCTGCTGACCGCGGCTTTAGGTTGGAATTTAAGGTTGCGAGGAGCTTTTTGGTGTCTATACGCACCAGGGGTGACGCCCTCATTGACCATAAGGATGTA  
WO (406) ACGGGTGTGTTTGGCGTCTTGGGTGCTGCTGACCGCGGCTTTAGGTTGGAATTTAAGGTTGCGAGGAGCTTTTTGGTGTCTATACGCACCAGGGGTGACGCCCTCATTGACCATAAGGATGTA

541

675

SM (541) GAAATACGCGAAACTAATGATGCCGCTGCCACAACAATGCTGCTGCCACAACGAATGCTGCTGGTGTGCTGGCAGCAGTGTGGCCAACAGCCGCTTACTGCGCCAGCGCCCGTAACCGATGGGCTGGTGGCGGTG  
FL (541) GAAATACGCGAAACTAATGATGCCGCTGCCACAACAATGCTGCTGCCACAACGAATGCTGCTGGTGTGCTGGCAGCAGTGTGGCCAACAGCCGCTTACTGCGCCAGCGCCCGTAACCGATGGGCTGGTGGCGGTG  
SI (541) GAAATACGCGAAACTAATGATGCCGCTGCCACAACA-----ATGCTGCTGGTGTGCTGGCAGCAGTGTGGCCAACAGCCGCTTACTGCGCCAGCGCCCGTAACCGATGGGCTGGTGGCGGTG  
OK (541) GAAATACGCGAAACTAATGATGCCGCTGCCACAACAATGCTGCTGCCACAACGAATGCTGCTGGTGTGCTGGCAGCAGTGTGGCCAACAGCCGCTTACTGCGCCAGCGCCCGTAACCGATGGGCTGGTGGCGGTG  
WO (541) GAAATACGCGAAACTAATGATGCCGCTGCCACAACAATGCTGCTGCCACAACGAATGCTGCTGGTGTGCTGGCAGCAGTGTGGCCAACAGCCGCTTACTGCGCCAGCGCCCGTAACCGATGGGCTGGTGGCGGTG

676

810

SM (676) CGTCACAAAGGCATTGGTAGCACTACTACCATGGTGAGCGTATGTTACGACGCCGATAGGCAATTCATAACGGCTCCGTTTCGTTGCCACACTTTTGTGTTGGATCTGGAATTGATGCTGTGGATCTGCTTGATATG  
FL (676) CGTCACAAAGGCATTGGTAGCACTACTACCATGGTGAGCGTATGTTACGACGCCGATAGGCAATTCATAACGGCTCCGTTTCGTTGCCACACTTTTGTGTTGGATCTGGAATTGATGCTGTGGATCTGCTTGATATG  
SI (658) CGTCACAAAGGCATTGGTAGCACTACTACCATGGTGAGCGTATGTTACGACGCCGATAGGCAATTCATAACGGCTCCGTTTCGTTGCCACACTTTTGTGTTGGATCTGGAATTGATGCTGTGGATCTGCTTGATATG  
OK (676) CGTCACAAAGGCATTGGTAGCACTACTACCATGGTGAGCGTATGTTACGACGCCGATAGGCAATTCATAACGGCTCCGTTTCGTTGCCACACTTTTGTGTTGGATCTGGAATTGATGCTGTGGATCTGCTTGATATG  
WO (676) CGTCACAAAGGCATTGGTAGCACTACTACCATGGTGAGCGTATGTTACGACGCCGATAGGCAATTCATAACGGCTCCGTTTCGTTGCCACACTTTTGTGTTGGATCTGGAATTGATGCTGTGGATCTGCTTGATATG

811

945

SM (811) ACTAGAGCTGCTTTCTCCGTGGAAGGAGCATTGGGTTCCATCAACAGGTGCTCAGTCACTGCAGTTGGTAGTTAGCGCCTTTGTGCACAGAGTTTTAGATAGCACTTTTAAACGATGTGCCTGTGCTTACCAA  
FL (811) ACTAGAGCTGCTTTCTCCGTGGAAGGAGCATTGGGTTCCATCAACAGGTGCTCAGTCACTGCAGTTGGTAGTTAGCGCCTTTGTGCACAGAGTTTTAGATAGCACTTTTAAACGATGTGCCTGTGCTTACCAA  
SI (793) ACTAGAGCTGCTTTCTCCGTGGAAGGAGCATTGGGTTCCATCAACAGGTGCTCAGTCACTGCAGTTGGTAGTTAGCGCCTTTGTGCACAGAGTTTTAGATAGCACTTTTAAACGATGTGCCTGTGCTTACCAA  
OK (811) ACTAGAGCTGCTTTCTCCGTGGAAGGAGCATTGGGTTCCATCAACAGGTGCTCAGTCACTGCAGTTGGTAGTTAGCGCCTTTGTGCACAGAGTTTTAGATAGCACTTTTAAACGATGTGCCTGTGCTTACCAA  
WO (811) ACTAGAGCTGCTTTCTCCGTGGAAGGAGCATTGGGTTCCATCAACAGGTGCTCAGTCACTGCAGTTGGTAGTTAGCGCCTTTGTGCACAGAGTTTTAGATAGCACTTTTAAACGATGTGCCTGTGCTTACCAA

946

1059

SM (946) TGGGGTGCCTTAGCAGGACCAGGGATGACCCCGTCGTAGTTTAGATGTACGAGTTTCAGACGTGCATATAAGCTACCTAGGGGCAGAAATTGGGCTTAGGTGGTTCTTCTAG  
FL (946) TGGGGTGCCTTAGCAGGACCAGGGATGACCCCGTCGTAGTTTAGATGTACGAGTTTCAGACGTGCATATAAGCTACCTAGGGGCAGAAATTGGGCTTAGGTGGTTCTTCTAG  
SI (928) TGGGGTGCCTTAGCAGGACCAGGGATGACCCCGTCGTAGTTTAGATGTACGAGTTTCAGACGTGCATATAAGCTACCTAGGGGCAGAAATTGGGCTTAGGTGGTTCTTCTAG  
OK (946) TGGGGTGCCTTAGCAGGACCAGGGATGACCCCGTCGTAGTTTAGATGTACGAGTTTCAGACGTGCATATAAGCTACCTAGGGGCAGAAATTGGGCTTAGGTGGTTCTTCTAG  
WO (946) TGGGGTGCCTTAGCAGGACCAGGGATGACCCCGTCGTAGTTTAGATGTACGAGTTTCAGACGTGCATATAAGCTACCTAGGGGCAGAAATTGGGCTTAGGTGGTTCTTCTAG

omp14

1 135

SM (1) TTGGTTGTCGGTGTCAATTGGGTGCGTCATGAAGCCCGTAGTATGTATAGCTGCTGCATTGTTGAGTACGATTGGTTATCTGGTCCCAGCGAGTTCCCATGGGATGAACGGTCGTGAAGATTTTACGTGAGTTTT  
FL (1) TTGGTTGTCGGTGTCAATTGGGTGCGTCATGAAGCCCGTAGTATGTATAGCTGCTGCATTGCTGAGTACGATTGGTTATCTGGTCCCAGCGAGTTCCCATGGGATGAACGGTCGTGAAGATTTTACGTGAGTTTT  
SI (1) TTGGTTGTCGGTGTCAATTGGGTGCGTCATGAAGCCCGTAGTATGTATAGCTGCTGCATTGTTGAGTACGATTGGTTATCTGGTCCCAGCGAGTTCCCATGGGATGAACGGTCGTGAAGATTTTACGTGAGTTTT  
OK (1) TTGGTTGTCGGTGTCAATTGGGTGCGTCATGAAGCCCGTAGTATGTATAGCTGCTGCATTGTTGAGTACGATTGGTTATCTGGTCCCAGCGAGTTCCCATGGGATGAACGGTCGTGAAGATTTTACGTGAGTTTT  
WO (1) TTGGTTGTCGGTGTCAATTGGGTGCGTCATGAAGCCCGTAGTATGTATAGCTGCTGCATTGCTGAGTACGATTGGTTATCTGGTCCCAGCGAGTTCCCATGGGATGAACGGTCGTGAAGATTTTACGTGAGTTTT

136 270

SM (136) GGGTACGGGCCACCATAGGGAAGATAAAGCGGGTTTAGGCTTAATGCTGCAAAAGAAACCGTCGCGATACTGCCCTACATTGGGAAGTGGGCTCTGCTGAGCTTTCTCCGCCAACTACGATTGGGCGGGGAA  
FL (136) GGGTACGGGCCACCATAGGGAAGATAAAGCGGGTTTAGGCTTAATGCTGCAAAAGAAACCGTCGCGATACTGCCCTACATTGGGAAGTGGGCTCTGCTGAGCTTTCTCCGCCAACTACGATTGGGCGGGGAA  
SI (136) GGGTACGGGCCACCATAGGGAAGATAAAGCGGGTTTAGGCTTAATGCTGCAAAAGAAACCGTCGCGATACTGCCCTACATTGGGAAGTGGGCTCTGCTGAGCTTTCTCCGCCAACTACGATTGGGCGGGGAA  
OK (136) GGGTACGGGCCACCATAGGGAAGATAAAGCGGGTTTAGGCTTAATGCTGCAAAAGAAACCGTCGCGATACTGCCCTACATTGGGAAGTGGGCTCTGCTGAGCTTTCTCCGCCAACTACGATTGGGCGGGGAA  
WO (136) GGGTACGGGCCACCATAGGGAAGATAAAGCGGGTTTAGGCTTAATGCTGCAAAAGAAACCGTCGCGATACTGCCCTACATTGGGAAGTGGGCTCTGCTGAGCTTTCTCCGCCAACTACGATTGGGCGGGGAA

271 405

SM (271) TCTACGGAGAGTCCGGCCATGGGTTTGAGAACAGCAGTCTGTGGGCCTCAGGGGAAGCGTGGGTTGCGTGGTACGCGGCACCAGGCTTGAGTTAGAATTCGGACATGAGCACTATGATTTCAAATCGCAAAAT  
FL (271) TCTACGGAGAGTCCGGCCATGGGTTTGAGAACAGCAGTCTGTGGGCCTCAGGGGAAGCGTGGGTTGCGTGGTACGCGGCACCAGGCTTGAGTTAGAATTCGGACATGAGCACTATGATTTCAAATCGCAAAAT  
SI (271) TCTACGGAGAGTCCGGCCATGGGTTTGAGAACAGCAGTCTGTGGGCCTCAGGGGAAGCGTGGGTTGCGTGGTACGCGGCACCAGGCTTGAGTTAGAATTCGGACATGAGCACTATGATTTCAAATCGCAAAAT  
OK (271) TCTACGGAGAGTCCGGCCATGGGTTTGAGAACAGCAGTCTGTGGGCCTCAGGGGAAGCGTGGGTTGCGTGGTACGCGGCACCAGGCTTGAGTTAGAATTCGGACATGAGCACTATGATTTCAAATCGCAAAAT  
WO (271) TCTACGGAGAGTCCGGCCATGGGTTTGAGAACAGCAGTCTGTGGGCCTCAGGGGAAGCGTGGGTTGCGTGGTACGCGGCACCAGGCTTGAGTTAGAATTCGGACATGAGCACTATGATTTCAAATCGCAAAAT

406 540

SM (406) TATGCCTTACTGAGCGCGGGAGTGCAGCTTTTGCCTGGTAAAAAGAATACTGCCAGTGCACGCGTGCAGTTCGAAGGTTTTCGGGCCGCGCTGCAGAAGGAGTTGTCCAAGCCGGCTTTGCAATCCATCAAG  
FL (406) TATGCCTTACTGAGCGCGGGAGTGCAGCTTTTGCCTGGTAAAAAGAATACTGCCAGTGCACGCGTGCAGTTCGAAGGTTTTCGGGCCGCGCTGCAGAAGGAGTTGTCCAAGCCGGCTTTGAGATCCATCAAG  
SI (406) TATGCCTTACTGAGCGCGGGAGTGCAGCTTTTGCCTGGTAAAAAGAATACTGCCAGTGCACGCGTGCAGTTCGAAGGTTTTCGGGCCGCGCTGCAGAAGGAGTTGTCCAAGCCGGCTTTGAGATCCATCAAG  
OK (406) TATGCCTTACTGAGCGCGGGAGTGCAGCTTTTGCCTGGTAAAAAGAATACTGCCAGTGCACGCGTGCAGTTCGAAGGTTTTCGGGCCGCGCTGCAGAAGGAGTTGTCCAAGCCGGCTTTGAGATCCATCAAG  
WO (406) TATGCCTTACTGAGCGCGGGAGTGCAGCTTTTGCCTGGTAAAAAGAATACTGCCAGTGCACGCGTGCAGTTCGAAGGTTTTCGGGCCGCGCTGCAGAAGGAGTTGTCCAAGCCGGCTTTGCAATCCATCAAG

541 675

SM (541) AAGCGTTTGGAAAGATATTAGAGACCATGACGAAGCGTGGGAAAGCAAAGCGCTTGTGACAAGGTTATAAGTAAGTTTATGATGCCATCATACTGGGGAGGAGGCCAAAAC---TGAACGTGCTGCTGCAACCGGT  
FL (541) AAGCGTTTGGAAAGATATTAGAGACCATGACGAAGCGTGGGAAAGCAAAGCGCTTGTGACAAGGTTATAAGTAAGTTTATGATGCCATCATACTGGGGAGGAGGCCAAAAC---TGAACGTGCTGCTGCAACCGGT  
SI (541) AAGCGTTTGGAAAGATATTAGAGACCATGACGAAGCGTGGGAAAGCAAAGCGCTTGTGACAAGGTTATAAGTAAGTTTATGATGCCATCATACTGGGGAGGAGGCCAAAACAACTGAACGTGCTGCTGCAACCGGT  
OK (541) AAGCGTTTGGAAAGATATTAGAGACCATGACGAAGCGTGGGAAAGCAAAGCGCTTGTGACAAGGTTATAAGTAAGTTTATGATGCCATCATACTGGGGAGGAGGCCAAAAC---TGAACGTGCTGCTGCAACCGGT  
WO (541) AAGCGTTTGGAAAGATATTAGAGACCATGACGAAGCGTGGGAAAGCAAAGCGCTTGTGACAAGGTTATAAGTAAGTTTATGATGCCATCATACTGGGGAGGAGGCCAAAAC---TGAACGTGCTGCTGCAACCGGT

676 810

SM (673) GCTGGTAGCGTGTGATACTCTGCACAGAACACGCAAGAGAGCAAGCGGAGACCAAGCCATCAGAGAGATTGTTAAATCTCAGAGCTCGCAAAGGGGTCATGGTTCGGGCAATTGCCACAAGCACAGAGGGCATG  
FL (673) GCTGGTAGCGTGTGATACTCTGCACAGAACACGCAAGAGAGCAAGCGGAAATCAAGTATCAGGATATTGTTGGCCTCTCAGGGCTCGCAAAGGGGTCATGGTTCGGGCAATTGCCACAAGCACAGAGGGCATG  
SI (673) ACTAGAGATACCGACACTCTGCCAGACGCAAGAGAGCAAGCGGAGACCAAGCCATCAGAGAGATTGTTAAATCTCAGAGCTCGCAAAGGGGTCATGGTTCGGGCAATTGCCACAAGCACAGAGGGCATG  
OK (673) GCTGGTAGCGTGTGATACTCTGCACAGAACACGCAAGAGAGCAAGCGGAAATCAAGTATCAGGATATTGTTGGCCTCTCAGGGCTCGCAAAGGGGTCATGGTTCGGGCAATTGCCACAAGCACAGAGGGCATG  
WO (673) GCTGGTAGCGTGTGATACTCTGCACAGAACACGCAAGAGAGCAAGCGGAAATCAAGTATCAGGATATTGTTGGCCTCTCAGGGCTCGCAAAGGGGTCATGGTTCGGGCAATTGCCACAAGCACAGAGGGCATG

811 945

SM (808) GAGATTGTGAAATAAGTGGGTCAGGGTAGTTTCAGCGATCCTGAGTGCATGCTATGATTTCCACAGGTGGGGTACTAGTTGACTGGAACAATGCTCCCTACGCTGCGCAGGGTTGGGTGCAAGCTTTGTA  
FL (808) GAGATTGTGAAATAAGTGGGTCAGGGTAGTTTCAGCGATCCTGAGTGCATGCTATGATTTCCACAGGTGGGGTACTAGTTGACTGGAACAATGCTCCCTACGCTGCGCAGGGTTGGGTGCAAGCTTTGTA  
SI (811) GAGATTGTGAAATAAGTGGGTCAGGGTAGTTTCAGCGATCCTGAGTGCATGCTATGATTTCCACAGGTGGGGTACTAGTTGACTGGAATAATGCTCCCTACGCTGCGCAGGGTTGGGTGCAAGCTTTGTA  
OK (808) GAGATTGTGAAATAAGTGGGTCAGGGTAGTTTCAGCGATCCTGAGTGCATGCTATGATTTCCACAGGTGGGGTACTAGTTGACTGGAATAATGCTCCCTACGCTGCGCAGGGTTGGGTGCAAGCTTTGTA  
WO (808) GAGATTGTGAAATAAGTGGGTCAGGGTAGTTTCAGCGATCCTGAGTGCATGCTATGATTTCCACAGGTGGGGTACTAGTTGACTGGAATAATGCTCCCTACGCTGCGCAGGGTTGGGTGCAAGCTTTGTA

946 1080

SM (943) GGACTGACCGCCCAACGATTTACGCCACAGCTTACCTGCCAGGTCAAGGCTGGTGTGAGTTACAGCATCACACCCAGCCTGGCAGCATTTCATTGGCGGCACCTGCCAGCAAAACACTAGGCACAACACTACGACAAC  
FL (943) GGACTGACCGCCCAACGATTTACGCCACAGCTTACCTGCCAGGTCAAGGCTGGTGTGAGTTACAGCATCACACCCAGCCTGGCAGCATTTCATTGGCGGCACCTGCCAGCAAAACACTAGGCACAACACTACGACAAC  
SI (943) GGACTGACCGCCCAACGATTTACGCCACAGCTTACCTGCCAGGTCAAGGCTGGTGTGAGTTACAGCATCACACCCAGCCTGGCAGCATTTCATTGGCGGCACCTGCCAGCAAAACACTAGGCACAACACTACGACAAC  
OK (943) GGACTGACTGCCCAACGATTTCAACCACAGCTTACCTGCCAGGTCAAGGCTGGTGTGAGTTACAGCATCACACCCAGCCTGGCAGCATTTCATTGGCGGCACCTGCCAGCAAAACACTAGGCACAACACTACGACAAC  
WO (943) GGACTGACCGCCCAACGATTTACGCCACAGCTTACCTGCCAGGTCAAGGCTGGTGTGAGTTACAGCATCACACCCAGCCTGGCAGCATTTCATTGGCGGCACCTGCCAGCAAAACACTAGGCACAACACTACGACAAC

1081 1200

SM (1078) ACCCTGCCACCGTGCAGTCGATGACGCCAGCCATTAGGAAAAACAAGGAGAAGGCTCAGCATCCTTCGGGCTACGCAATATAGGGGTAGAAGTACAGGATTCAGGATTCGATTCAG  
FL (1078) ACCCTGCCACCGTGCAGTCGATGACGCCAGCCATTAGGAAAAACAAGGAGAAGGCTCAGCATCCTTCGGGCTACGCAATATAGGGGTAGAAGTACAGGATTCAGGATTCGATTCAG  
SI (1081) ACCCTGCCACCGTGCAGTCGATGACGCCAGCCATTAGGAAAAACAAGGAGAAGGCTCAGCATCCTTCGGGCTACGCAATATAGGGGTAGAAGTACAGGATTCAGGATTCGATTCAG  
OK (1078) ACCCTGCCACCGTGCAGTCGATGACGCCAGCCATTAGGAAAAACAAGGAGAAGGCTCAGCATCCTTCGGGCTACGCAATATAGGGGTAGAAGTACAGGATTCAGGATTCGATTCAG  
WO (1078) ACCCTGCCACCGTGCAGTCGATGACGCCAGCCATTAGGAAAAACAAGGAGAAGGCTCAGCATCCTTCGGGCTACGCAATATAGGGGTAGAAGTACAGGATTCAGGATTCGATTCAG
